# Supplementary material for: GLP-1 RA Treatment Patterns Among Type 2 Diabetes Patients in Five European Countries
Source: Springer Nature journal article supplement (doi:10.1007/s13300-016-0224-5), 2017-01-09
Supplement: MOESM1 [file 11986982]

**Table 1. Demographic and Clinical Characteristics**

|                                                                                                              | Belgium LRx   |              |               | France LRx       |                 | Germany LRx     |                  |                 |                 | Netherlands LRx |               |                 | Sweden        |               |                 |
|--------------------------------------------------------------------------------------------------------------|---------------|--------------|---------------|------------------|-----------------|-----------------|------------------|-----------------|-----------------|-----------------|---------------|-----------------|---------------|---------------|-----------------|
|                                                                                                              | exBID<br>N=80 | LIXI<br>N=20 | LIRA<br>N=666 | exBID<br>N=1,884 | LIRA<br>N=8,606 | exQW<br>N=1,035 | exBID<br>N=2,261 | LIXI<br>N=1,731 | LIRA<br>N=6,916 | exQW<br>N=122   | exBID<br>N=44 | LIRA<br>N=1,324 | exQW<br>N=342 | exBID<br>N=70 | LIRA<br>N=3,443 |
| <b>Age at Index (%)<sup>a</sup></b>                                                                          |               |              |               |                  |                 |                 |                  |                 |                 |                 |               |                 |               |               |                 |
| 18-39                                                                                                        | 2.6           | 5.0          | 2.9           | 0.9              | 1.9             | 5.5             | 5.4              | 4.7             | 5.3             | 4.9             | 2.3           | 5.6             | 3.5           | s             | 4.1             |
| 40-49                                                                                                        | 12.5          | 10.0         | 12.5          | 6.7              | 10.2            | 17.3            | 15.9             | 16.6            | 16.2            | 18.0            | 11.4          | 19.3            | 14.0          | s             | 15.2            |
| 50-64                                                                                                        | 46.3          | 45.0         | 51.2          | 47.6             | 51.0            | 48.9            | 52.5             | 49.2            | 52.3            | 41.8            | 59.1          | 47.4            | 52.3          | 48.6          | 48.3            |
| 65+                                                                                                          | 38.8          | 40.0         | 33.0          | 44.8             | 36.9            | 28.4            | 26.3             | 29.5            | 26.2            | 35.3            | 27.3          | 27.7            | 30.1          | 40.0          | 32.4            |
| Mean                                                                                                         |               |              |               | 62.9             | 60.9            | 58.1            | 57.8             | 58.2            | 57.7            | 58.7            | 59.8          | 57.1            | 59.1          | 60.9          | 58.8            |
| SD                                                                                                           |               |              |               | 9.6              | 9.8             | 11.5            | 10.9             | 10.9            | 10.9            | 10.6            | 9.9           | 10.8            | 10.2          | 10.9          | 10.5            |
| Median                                                                                                       |               |              |               | 63               | 61              | 58              | 58               | 59              | 58              | 60              | 60            | 58              | 60            | 62            | 60              |
| <b>Female (%)<sup>b</sup></b>                                                                                | 53.8          | 55.0         | 47.3          |                  |                 | 54.8            | 53.8             | 52.6            | 53.0            | 45.1            | 47.7          | 55.1            | 59.9          | 61.4          | 59.2            |
| <b>Follow-up (months)</b>                                                                                    |               |              |               |                  |                 |                 |                  |                 |                 |                 |               |                 |               |               |                 |
| Mean                                                                                                         | 26.6          | 20.0         | 25.9          | 30.7             | 30.6            | 25.8            | 26.1             | 25.3            | 25.9            | 26.9            | 25.5          | 26.6            | 18.3          | 17.7          | 17.7            |
| SD                                                                                                           | 4.1           | 2.4          | 4.5           | 2.2              | 2.2             | 5.2             | 5.0              | 3.8             | 4.8             | 4.8             | 5.0           | 4.8             | 3.4           | 3.2           | 3.3             |
| Median                                                                                                       | 27            | 21           | 26            | 31               | 31              | 26              | 27               | 26              | 26              | 28              | 26            | 27              | 19            | 18            | 18              |
| <b>Number of antihyperglycemic therapy classes used in the 180-day Pre-Index Period</b>                      |               |              |               |                  |                 |                 |                  |                 |                 |                 |               |                 |               |               |                 |
| Mean                                                                                                         | 1.7           | 3.0          | 2.0           | 2.1              | 2.1             | 1.6             | 2.0              | 2.3             | 1.7             | 2.3             | 2.0           | 2.3             | 2.1           | 2.0           | 2.0             |
| SD                                                                                                           | 1.2           | 0.9          | 1.0           | 0.8              | 0.8             | 1.0             | 1.1              | 1.0             | 1.1             | 0.8             | 1.0           | 0.9             | 0.9           | 1.0           | 0.9             |
| Median                                                                                                       | 2             | 3            | 2             | 2                | 2               | 1               | 2                | 2               | 2               | 2               | 2             | 2               | 2             | 2             | 2               |
| <b>Frequent (&gt;10%) antihyperglycemic therapy classes used in the 180-day Pre-Index Period<sup>c</sup></b> |               |              |               |                  |                 |                 |                  |                 |                 |                 |               |                 |               |               |                 |
| Fast-acting insulin                                                                                          | 6.2           | 20.0         | 2.7           | 4.4              | 6.0             | 12.1            | 25.5             | 23.7            | 15.9            | 5.7             | 18.1          | 18.0            | 19.2          | 27.1          | 22.6            |
| Intermediate-acting insulin                                                                                  | 1.2           | 25.0         | 2.5           | 1.4              | 1.1             | 6.2             | 14.3             | 10.2            | 6.2             | 3.2             | 2.2           | 3.1             | 21.6          | 28.5          | 22.9            |
| Intermediate/fast-acting insulin                                                                             | 2.5           | 0.0          | 2.1           | 1.3              | 2.3             | 1.1             | 3.5              | 2.8             | 2.0             | 3.2             | 2.2           | 5.5             | 8.4           | 22.8          | 11.3            |
| Long-acting insulin                                                                                          | 8.7           | 55.0         | 4.0           | 22.2             | 25.0            | 13.7            | 26.2             | 39.2            | 19.9            | 10.6            | 29.5          | 26.2            | 14.6          | 20.0          | 21.0            |
| Biguanide                                                                                                    | 61.2          | 85.0         | 79.4          | 87.3             | 86.9            | 54.0            | 64.7             | 63.3            | 64.5            | 88.5            | 70.4          | 84.6            | 82.1          | 74.2          | 79.8            |
| DPP-IV                                                                                                       | 22.5          | 35.0         | 27.9          | 4.1              | 2.8             | 17.2            | 13.4             | 19.2            | 13.8            | 32.7            | 6.8           | 18.1            | 28.6          | s             | 18.1            |
| DPP-IV/Biguanide                                                                                             | 1.2           | 0.0          | 3.7           | 4.1              | 3.6             | 30.0            | 22.8             | 35.6            | 21.9            | 7.3             | 0.0           | 3.1             | 3.2           | s             | 1.7             |
| Glinide                                                                                                      | 22.5          | 15.0         | 13.2          | 14.5             | 14.0            | 5.2             | 4.7              | 6.5             | 5.0             | 0.8             | 0.0           | 0.0             | 5.5           | s             | 3.8             |
| Sulfonylurea                                                                                                 | 43.7          | 60.0         | 64.8          | 64.5             | 58.2            | 17.6            | 17.3             | 16.9            | 16.9            | 74.5            | 56.8          | 62.0            | 27.1          | 14.2          | 21.4            |

|                                                                                                              |      |      |      |      |      |      |      |      |      |      |      |      |          |          |      |
|--------------------------------------------------------------------------------------------------------------|------|------|------|------|------|------|------|------|------|------|------|------|----------|----------|------|
| <i>None</i>                                                                                                  | 23.7 | 0.0  | 11.2 | 0.1  | 0.3  | 9.3  | 8.5  | 2.3  | 9.6  | 0.0  | 6.8  | 3.0  | <i>s</i> | <i>s</i> | 1.6  |
| <b>Number of concomitant antihyperglycemic therapy classes used on the Index Date<sup>d</sup></b>            |      |      |      |      |      |      |      |      |      |      |      |      |          |          |      |
| Mean                                                                                                         | 1.6  | 2.0  | 1.6  | 2.0  | 1.9  | 1.0  | 1.2  | 1.2  | 1.1  | 1.6  | 1.5  | 1.4  | 1.2      | 1.4      | 1.26 |
| SD                                                                                                           | 0.8  | 1.0  | 0.7  | 0.7  | 0.8  | 0.8  | 0.8  | 0.9  | 0.8  | 0.8  | 0.7  | 0.8  | 0.9      | 0.9      | 0.9  |
| Median                                                                                                       | 2    | 2    | 2    | 2    | 2    | 1    | 1    | 1    | 1    | 2    | 2    | 1    | 1        | 1        | 1    |
| <b>Frequent (&gt;10%) concomitant antihyperglycemic therapy classes used on the Index Date<sup>c,d</sup></b> |      |      |      |      |      |      |      |      |      |      |      |      |          |          |      |
| Fast-acting insulin                                                                                          | 5.0  | 5.0  | 0.9  | 2.8  | 4.5  | 7.2  | 10.5 | 10.9 | 7.0  | 2.4  | 4.5  | 3.9  | 9.3      | 14.2     | 13.1 |
| Intermediate-acting insulin                                                                                  | 0.0  | 15.0 | 1.0  | 1.0  | 0.9  | 1.9  | 7.6  | 5.4  | 2.2  | 0.0  | 2.2  | 0.3  | 13.7     | 20.0     | 15.0 |
| Long-acting insulin                                                                                          | 7.5  | 50.0 | 1.3  | 18.3 | 21.2 | 7.5  | 16.1 | 24.3 | 12.1 | 4.9  | 6.8  | 6.1  | 8.7      | 15.7     | 16.4 |
| Biguanide                                                                                                    | 76.2 | 70.0 | 80.0 | 83.9 | 82.7 | 56.0 | 64.4 | 54.5 | 64.6 | 77.0 | 79.5 | 72.3 | 53.5     | 54.2     | 57.4 |
| Glinide                                                                                                      | 23.7 | 15.0 | 9.0  | 12.6 | 12.5 | 3.1  | 2.6  | 3.3  | 3.2  | 0.0  | 0.0  | 0.0  | 3.2      | <i>s</i> | 2.1  |
| Sulfonylurea                                                                                                 | 46.2 | 45.0 | 66.2 | 59.2 | 53.0 | 8.5  | 8.3  | 5.3  | 8.5  | 62.2 | 56.8 | 53.3 | 16.6     | <i>s</i> | 11.0 |
| <i>None</i>                                                                                                  | 6.2  | 10.0 | 7.6  | 3.7  | 4.2  | 24.5 | 18.0 | 23.1 | 20.0 | 11.4 | 6.8  | 13.2 | 21.6     | 15.7     | 18.0 |

<sup>a</sup>Continuous age unavailable in Belgium LRx; <sup>b</sup>Out of non-missing gender in Germany LRx; Gender unavailable in France LRx; <sup>c</sup>Not mutually exclusive; <sup>d</sup>Concomitant = 1) time between therapy class prescriptions in pre- and post-index of 120 days or less, with overlap on index or 2) with prescription on the index date.

*s* = Data suppressed in Sweden due to patient count less than 10 in compliance with Swedish privacy legislation. exBID=exenatide twice-daily; exQW=exenatide once-weekly; LIXI=lixisenatide; LIRA=liraglutide
